# Supplementary material for: Subfertility as Overlapping of Nutritional, Endocrine, Immune, and Cardiometabolic Dysregulations—A Study Focused on Biochemical Endophenotypes of Subfertile Couples
Source: MDPI journal article supplement (doi:10.3390/jcm12186094), 2023-09-21

# Supplementary

Table S1 Characteristics of thyroid function and thyroid autoimmunity markers in the study participants.

|                                                       | Participants<br>diagnosed with<br>subfertility | Fertile subjects<br>with at least<br>3 children | p-value              |
|-------------------------------------------------------|------------------------------------------------|-------------------------------------------------|----------------------|
| N/ Male                                               | 100 / 50                                       | 50 / 25                                         |                      |
| TSH (μIU/mL) (IQR)                                    | 1.38 (0.94-1.81)                               | 1.29 (0.82-1.72)                                | 0.399 <sup>U</sup>   |
| TSH <1.5 (%)                                          | 58                                             | 58                                              | 0.964 <sup>F</sup>   |
| TSH 1.5 < 2.5 (%)                                     | 33                                             | 34                                              |                      |
| TH≥ 2.5 (%)                                           | 9                                              | 8                                               |                      |
| Female                                                | 1.44 (1.00-1.96)                               | 1.29 (0.84-1.68)                                | 0.315 <sup>U</sup>   |
| Male                                                  | 1.29 (0.92-1.65)                               | 1.21 (0.80-1.80)                                | 0.783 <sup>U</sup>   |
| Free T4 (ng/dL) (IQR)                                 | 1.10 (1.02-1.19)                               | 0.96 (0.92-1.02)                                | <0.0001 <sup>U</sup> |
| % of Reference Range                                  | 51.3%                                          | 33.3%                                           |                      |
| Female                                                | 1.13 (1.03-1.20)                               | 0.95 (0.89-1.02)                                | <0.0001 <sup>U</sup> |
| % of Reference Range                                  | 88.6%                                          | 32.1%                                           |                      |
| Male                                                  | 1.08 (1.02-1.16)                               | 1.00 (0.93-1.07)                                | 0.0015 <sup>U</sup>  |
| % of Reference Range                                  | 48.7%                                          | 38.5%                                           |                      |
| Anti-thyroid peroxidase antibodies (anti-TPO) (IU/mL) |                                                |                                                 |                      |
| Q2 (IQR)                                              | 0.44 (0.14-1.41)                               | 0.15 (0.05-0.33)                                | 0.003 <sup>U</sup>   |
| 90th Percentile                                       | 112.0                                          | 1.2                                             |                      |
| Positive anti-TPO, N (%)                              | 22 (22%)                                       | 4 (8%)                                          |                      |
| TPO-positive sub-group (IQR)                          | 98.0 (37.4-256.0)                              | 232 (7.4-322.6)                                 | 0.644 <sup>U</sup>   |
| Female                                                |                                                |                                                 |                      |
| Q2 (IQR)                                              | 0.52(0.20-12.05)                               | 0.17 (0.04-0.69)                                | 0.028 <sup>U</sup>   |
| Positive anti-TPO, N (%)                              | 14 (28%)                                       | 2 (%)                                           | 0.071 <sup>F</sup>   |
| Male                                                  |                                                |                                                 |                      |
| Q2 (IQR)                                              | 0.32(0.11-0.74)                                | 0.12 (0.05-0.27)                                | 0.027 <sup>U</sup>   |
| Positive anti-TPO, N (%)                              | 8 (16%)                                        | 2 (8%)                                          | 0.480 <sup>F</sup>   |
| Anti- thyroglobulin antibodies (anti-TG) (IU/mL)      |                                                |                                                 |                      |
| Q2 (IQR)                                              | 2.17 (0.90-8.76)                               | 1.20 (0.87-4.70)                                | 0.105 <sup>U</sup>   |
| Positive anti-TG, N (%)                               | 34 (34%)                                       | 15 (30%)                                        | 0.713 <sup>F</sup>   |
| TG-positive sub-group (IQR)                           | 30.6 (7.8-105.5)                               | 8.5 (4.9-49.0)                                  | 0.074 <sup>U</sup>   |
| Female                                                |                                                |                                                 |                      |
| Q2 (IQR)                                              | 3.35 (1.08-26.18)                              | 2.99 (0.92-5.66)                                | 0.234 <sup>U</sup>   |
| 90th Percentile                                       | 239.7                                          | 28.6                                            |                      |
| Positive anti-TG, N (%)                               | 24 (48%)                                       | 10 (40%)                                        |                      |
| Male                                                  |                                                |                                                 |                      |
| Q2 (IQR)                                              | 1.55 (0.83-3.93)                               | 0.95 (0.78-2.48)                                | 0.158 <sup>U</sup>   |
| 90th Percentile                                       | 30.79                                          | 61.15                                           |                      |
| Positive anti-TG, N (%)                               | 10/50 (20%)                                    | 5/25 (20%)                                      | 1.000 <sup>F</sup>   |

<sup>F</sup> = Fisher's exact test; two-sided P; <sup>U</sup> = Mann-Whitney U test, two-tailed P; Q2-median (Q2-Mdn), IQR - interquartile range; Levels of anti-TG > 4.110 IU/mL and anti-TPO > 5.610 IU/mL were defined as antibody positive.

Table S2. Characteristics of lipid profiles in the studied subjects.

|                                      | Subjects diagnosed with<br>subfertility | Fertile couples<br>with at least 3 children | p-value             |
|--------------------------------------|-----------------------------------------|---------------------------------------------|---------------------|
| N/ Male                              | 100 / 50                                | 50 / 25                                     |                     |
| Total Cholesterol (mg/dL) (IQR)      | 198 (169-218)                           | 195(180-228)                                | 0.346 <sup>U</sup>  |
| Female                               | 179 (164-206)                           | 186 (176-218)                               | 0.185 <sup>U</sup>  |
| Male                                 | 213 (178-229)                           | 206 (183-234)                               | 0.866 <sup>U</sup>  |
| Non-HDL-C (mg/dL)                    | 137 (111-166)                           | 139 (117-164)                               | 0.735 <sup>U</sup>  |
| Female                               | 122 (108-143)                           | 124 (108-153)                               | 0.700 <sup>U</sup>  |
| Male                                 | 155 (127-178)                           | 147 (132-180)                               | 0.870 <sup>U</sup>  |
| LDL-C (mg/dL)                        | 116 (96-142)                            | 120 (106-144)                               | 0.428 <sup>U</sup>  |
| Female                               | 106 (91-128)                            | 110 (99-134)                                | 0.283 <sup>U</sup>  |
| Male                                 | 133 (108-157)                           | 127 (113-157)                               | 0.928 <sup>U</sup>  |
| LDL-C>130 mg/dL, N (%)               | 43 (43%)                                | 21 (42%)                                    | 1.000 <sup>F</sup>  |
| TC to HDL-C Ratio                    | 3.46 (2.99-4.38)                        | 3.45 (2.90-4.20)                            | 0.708 <sup>U</sup>  |
| Female                               | 3.13 (2.85-3.72)                        | 3.15 (2.64-3.45)                            | 0.312 <sup>U</sup>  |
| Male                                 | 3.95 (3.24-4.65)                        | 4.13 (3.41-4.56)                            | 0.698 <sup>U</sup>  |
| TC/HDL>4, Male, N (%)                | 26 (52%)                                | 14 (56%)                                    | 0.809 <sup>F</sup>  |
| HDL-C (mg/dL)                        | 54 (46-63)                              | 56 (51-64)                                  | 0.222 <sup>U</sup>  |
| Female                               | 55.5 (48.8-64.0)                        | 62 (54.5-71.0)                              | 0.032 <sup>U</sup>  |
| Male                                 | 52.5 (44.8-59.5)                        | 51 (42.5-58.5)                              | 0.723 <sup>U</sup>  |
| HDL-C <50 mg/dL (Female) (%)         | 14 (28%)                                | 1 (4%)                                      | 0.015 <sup>F</sup>  |
| HDL-C <40 mg/dL (Male) (%)           | 4 (8%)                                  | 3 (12%)                                     | 0.680 <sup>F</sup>  |
| Triglycerides (mg/dL)                | 82 (58-116)                             | 87 (62-117)                                 | 0.458 <sup>U</sup>  |
| Female                               | 66 (56-93)                              | 66 (57-93)                                  | 0.995 <sup>U</sup>  |
| Male                                 | 100 (66-128)                            | 103 (80-156)                                | 0.271 <sup>U</sup>  |
| TG to HDL-C Ratio                    | 3.5 (3.0-4.4)                           | 3.5 (2.9-4.2)                               | 0.706 <sup>U</sup>  |
| Female                               | 1.2 (0.9-1.9)                           | 1.1 (0.8-1.4)                               | 0.438 <sup>U</sup>  |
| Male                                 | 1.8 (1.2-3.2)                           | 2.2(1.2-3.4)                                | 0.266 <sup>U</sup>  |
| Male Subgroup with LDL-C >120 mg/dL: |                                         |                                             |                     |
| N (%)                                | 31 (62%)                                | 16 (64%)                                    | 1.000 <sup>F</sup>  |
| HOMA-IR                              | 1.82 (1.24-2.29)                        | 1.33 (1.11-1.73)                            | 0.049 <sup>U</sup>  |
| HOMA-IR>1.9                          | 13 (42%)                                | 2 ( 13%)                                    | <0.001 <sup>F</sup> |
| ALT (IU/mL)                          | 24 (16-32)                              | 15 (10-24)                                  | 0.016 <sup>U</sup>  |
| AST to ALT Ratio                     | 0.90 (0.74-1.31)                        | 1.40 (0.92-1.87)                            | 0.039 <sup>U</sup>  |

<sup>F</sup> = Fisher's exact test; two-sided P; <sup>U</sup> = Mann-Whitney U test, two-tailed P; Q2- Mdn, IQR - interquartile range

Table S3. Characteristics of laboratory measurements in the subfertile and fertile study groups.

|                                      | Participants<br>diagnosed with subfertility | Fertile subjects<br>with at least<br>3 children | p-value             |
|--------------------------------------|---------------------------------------------|-------------------------------------------------|---------------------|
| N/ Male                              | 100 / 50                                    | 50 / 25                                         |                     |
| Total IgE (kU/L) (IQR)               | 32.8 (15.9-84.1)                            | 24.8 (11.8-45.8)                                |                     |
| 90th Percentile                      | 180.7                                       | 82.4                                            | 0.016 <sup>U</sup>  |
| Total IgE>100 kU/L N (%)             | 21 (21%)                                    | 3 (6%)                                          | 0.019 <sup>F</sup>  |
| Specific-IgE sensitization N (%)     | 13 (13%)                                    | 3 (6%)                                          | 0.265 <sup>F</sup>  |
| IgA (g/L) (IQR)                      | 2.2 (1.6-2.6)                               | 1.9 (1.7-2.5)                                   | 0.349 <sup>U</sup>  |
| Female                               | 2.1 (1.6-2.5)                               | 1.9 (1.5-2.3)                                   | 0.317 <sup>U</sup>  |
| Male                                 | 2.2 (1.7-3.0)                               | 1.9 (1.8-2.9)                                   | 0.609 <sup>U</sup>  |
| SHBG (nmol/L) (IQR)                  | 49.9 (31.9-70.6)                            | 49.6 (36.4-69.4)                                | 0.811 <sup>U</sup>  |
| Female                               | 65.8 (52.1-90.6)                            | 66.0 (49.2-87.9)                                | 0.937 <sup>U</sup>  |
| Male                                 | 37.2 (26.5-49.4)                            | 39.0 (31.2-49.6)                                | 0.455 <sup>U</sup>  |
| ALT IU/mL                            | 14 (9-24)                                   | 13 (8-18)                                       | 0.140 <sup>U</sup>  |
| ALT>19 IU (Female) N (%)             | 9 (18%)                                     | 1 (4%)                                          | 0.150 <sup>F</sup>  |
| ALT>30 IU (Male) N (%)               | 14 (28%)                                    | 3 (12%)                                         | 0.151 <sup>F</sup>  |
| ASP IU/L                             | 18 (16-23)                                  | 18.5 (15.5-22)                                  | 0.903 <sup>U</sup>  |
| CRP mg/L                             | 1.1 (0.3-2.1)                               | 1.4 (0.6-2.3)                                   | 0.124 <sup>U</sup>  |
| Creatinine mg/dL                     | 0.78 (0.71-0.91)                            | 0.80 (0.75-0.90)                                | 0.563 <sup>U</sup>  |
| Fe µg/dL                             | 93 (71-127)                                 | 94.5 (69.8-124)                                 | 0.936 <sup>U</sup>  |
| UIBC µg/dL                           | 198 (165-248)                               | 207 (161-235)                                   | 0.507 <sup>U</sup>  |
| Na mmol/L (IQR)                      | 139 (138-140)                               | 141 (139-142)                                   | 0.0005 <sup>U</sup> |
| Female                               | 139.0 (138.0-140.0)                         | 140.0 (139.0-141.5)                             | 0.006 <sup>U</sup>  |
| Male                                 | 140.0 (139.0-141.0)                         | 141.0 (139-142.5)                               | 0.020 <sup>U</sup>  |
| K mmol/L (mean ±SEM)                 | 4.46 ±0.03                                  | 4.38 ±0.04                                      | 0.099 <sup>U</sup>  |
| Female, mean ±SEM                    | 4.48±0.03                                   | 4.29 ±0.04                                      | 0.023 <sup>U</sup>  |
| Male, mean ±SEM                      | 4.47 ±0.05                                  | 4.45 ±0.05                                      | 0.995 <sup>U</sup>  |
| Fasting glucose (mg/dL) ( Mdn) (IQR) | 87.0 (83.0-94.8)                            | 87.0 (82.8-93.0)                                | 0.652 <sup>U</sup>  |
| Female                               | 86.0 (83.0-93.0)                            | 86.0 (83.5-91.5)                                | 0.835 <sup>U</sup>  |
| Male                                 | 89.5 (83.8-96.3)                            | 87.0 (83.5-95.5)                                | 0.605 <sup>U</sup>  |
| Hyperglycemia (≥ 100 mg/dL), N (%)   | 9 (9%)                                      | 4 (8%)                                          | 1.000 <sup>F</sup>  |
| Female                               | 3 (6%)                                      | 3 (12%)                                         | 0.394 <sup>F</sup>  |
| Male                                 | 6 (12)                                      | 1(4%)                                           | 1.000 <sup>F</sup>  |
| Fasting Insulin (uU/mL) ( Mdn) (IQR) | 6.5 (4.8-9.8)                               | 5.6 (4.7-8.4)                                   | 0.122 <sup>U</sup>  |
| Female                               | 6.2 (4.7-9.5)                               | 5.3 (4.1-10.0)                                  | 0.298 <sup>U</sup>  |
| Male                                 | 8.3 (4.9-10.1)                              | 5.7 (5.2-7.9)                                   | 0.216 <sup>U</sup>  |
| Hyperinsulinemia (>12 uU/mL), N(%)   | 13 (13%)                                    | 1 (2%)                                          | 0.036 <sup>F</sup>  |
| Female N (%)                         | 5 (10%)                                     | 1 (4%)                                          | 0.657 <sup>F</sup>  |
| Male N (%)                           | 8 (16%)                                     | 0 (0%)                                          | 0.046 <sup>F</sup>  |
| HOMA-IR ( Mdn) (IQR)                 | 1.47 (0.96-2.06)                            | 1.28 (1.01-1.80)                                | 0.170 <sup>U</sup>  |
| Female                               | 1.34 (0.92-2.02)                            | 1.15 (0.88-1.96)                                | 0.455 <sup>U</sup>  |
| Male                                 | 1.53 (1.10-2.22)                            | 1.43 (1.12-1.73)                                | 0.192 <sup>U</sup>  |

<sup>F</sup> = Fisher's exact test; two-sided P; <sup>U</sup> = Mann-Whitney U test, two-tailed P; IQR - interquartile range; SEM - standard error of mean.

Figure S1. Distribution of laboratory components of metabolic syndrome in subfertile and fertile couples.

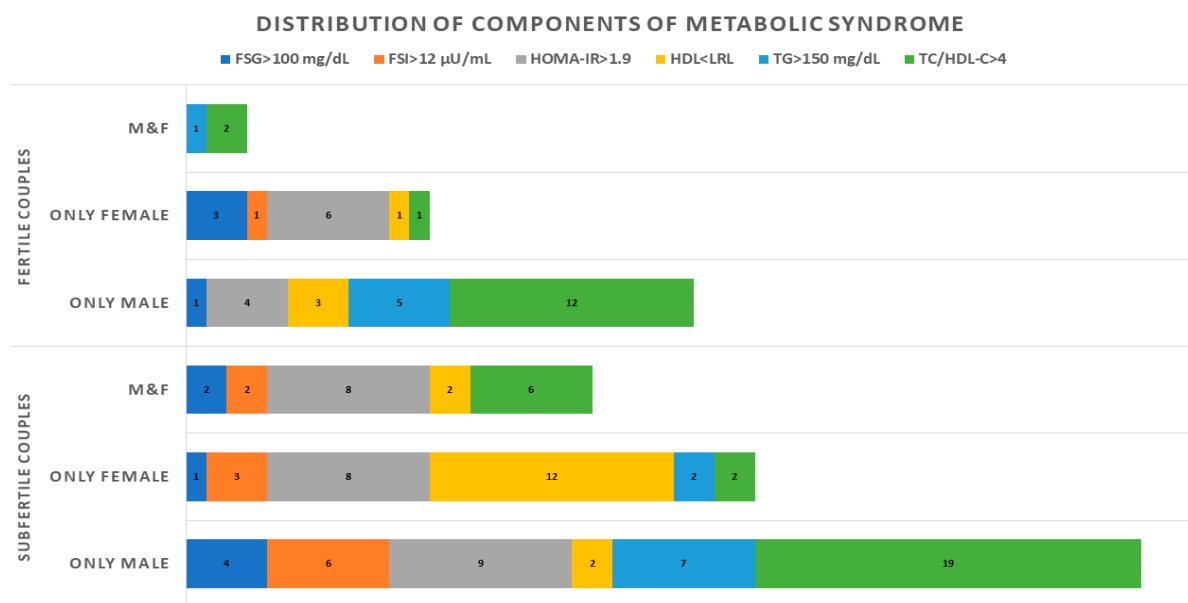

Supplement: s1 [file s1]
